# Supplementary material for: Vaccine breakthrough hypoxemic COVID-19 pneumonia in patients with auto-Abs neutralizing type I IFNs
Source: PubMed Central journal article supplement (PMC9210448; doi:10.1126/sciimmunol.abp8966), 2022-06-14
Supplement: sciimmunol.abp8966_sm.pdf [file sciimmunol.abp8966_sm.pdf]

Supplementary Materials for

**Vaccine breakthrough hypoxemic COVID-19 pneumonia in patients with auto-Abs neutralizing type I IFNs**

Paul Bastard *et al.*

Corresponding authors: Mark S. Anderson, [Mark.Anderson@ucsf.edu](mailto:Mark.Anderson@ucsf.edu); Jean-Laurent Casanova, [jean-laurent.casanova@rockefeller.edu](mailto:jean-laurent.casanova@rockefeller.edu); Joseph L. DeRisi, [jderisi@gmail.com](mailto:jderisi@gmail.com)

DOI: 10.1126/sciimmunol.abp8966

**The PDF file includes:**

Materials and Methods  
Fig. S1  
Table S1

**Other Supplementary Material for this manuscript includes the following:**

Data file S1

Supplementary Materials for

**Vaccine breakthrough hypoxemic COVID-19 pneumonia  
in patients with auto-Abs neutralizing type I IFNs**

Paul Bastard<sup>1-4,\*</sup>, Sara Vazquez<sup>5-7,\*</sup>, Jamin Liu<sup>8,9,\*</sup>, Matthew T. Laurie<sup>8,\*</sup>, Chung Yu Wang<sup>10,\*</sup>,  
Adrian Gervais<sup>1,2,\*</sup>, Tom Le Voyer<sup>1,2,\*</sup>, Lucy Bizien<sup>1,2,\$</sup>, Colin Zamecnik<sup>11,\$</sup>, Quentin  
Philippot<sup>1,2,\$</sup>, Jérémie Rosain<sup>1,2,\$</sup>, Emilie Catherinot<sup>12</sup>, Andrew Willmore<sup>10</sup>, Anthea M.  
Mitchell<sup>10</sup>, Rebecca Bair<sup>11</sup>, Pierre Garçon<sup>13</sup>, Heather Kenney<sup>14</sup>, Arnaud Fekkar<sup>1,2,15</sup>, Maria  
Salagianni<sup>16</sup>, Garyphallia Poulakou<sup>17</sup>, Eleni Siouti<sup>16</sup>, Sabina Sahanic<sup>18</sup>, Ivan Tancevski<sup>18</sup>,  
Günter Weiss<sup>18</sup>, Laurenz Nagl<sup>19</sup>, Jérémy Manry<sup>1,2</sup>, Sotirija Duvlis<sup>20,21</sup>, Daniel Arroyo-  
Sánchez<sup>22</sup>, Estela Paz Artal<sup>22</sup>, Luis Rubio<sup>8</sup>, Cristiano Perani<sup>23</sup>, Michela Bezzi<sup>24</sup>, Alessandra  
Sottini<sup>25</sup>, Virginia Quaresima<sup>25</sup>, Lucie Roussel<sup>26,27</sup>, Donald C. Vinh<sup>26,27</sup>, Luis Felipe Reyes<sup>28,29</sup>,  
Margaux Garzaro<sup>30</sup>, Nevin Hatipoglu<sup>31</sup>, David Boutboul<sup>32</sup>, Yacine Tandjaoui-Lambiotte<sup>33-35</sup>,  
Alessandro Borghesi<sup>36</sup>, Anna Aliberti<sup>37</sup>, Irene Cassaniti<sup>38</sup>, Fabienne Venet<sup>39-41</sup>, Guillaume  
Monneret<sup>39,40</sup>, Rabih Halwani<sup>42,43</sup>, Narjes Saheb Sharif-Askari<sup>42</sup>, Jeffrey Danielson<sup>14</sup>, Sonia  
Burrel<sup>44</sup>, Caroline Morbieu<sup>45</sup>, Yurii Stepanovskyy<sup>46</sup>, Anastasia Bondarenko<sup>46</sup>, Alla Volokha<sup>46</sup>,  
Oksana Boyarchuk<sup>47</sup>, Alenka Gagro<sup>48</sup>, Mathilde Neuville<sup>49</sup>, Bénédicte Neven<sup>50</sup>, Sevgi Keles<sup>51</sup>,  
Romain Hernu<sup>52</sup>, Antonin Bal<sup>53</sup>, Antonio Novelli<sup>54</sup>, Giuseppe Novelli<sup>55</sup>, Kahina Saker<sup>56</sup>, Oana  
Ailioaie<sup>57</sup>, Arnau Antolí<sup>58</sup>, Eric Jeziorski<sup>59</sup>, Gemma Rocamora-Blanch<sup>58</sup>, Carla Teixeira<sup>60</sup>,  
Clarisse Delaunay<sup>61</sup>, Marine Lhuillier<sup>62</sup>, Paul Le Turnier<sup>61</sup>, Yu Zhang<sup>14,63</sup>, Matthieu Mahevas<sup>64-  
66</sup>, Qiang Pan-Hammarström<sup>67</sup>, Hassan Abolhassani<sup>67</sup>, Thierry Bompouil, Ph.D,<sup>68</sup>, Karim  
Dorgham<sup>69</sup>, COVID HGE consortium<sup>†</sup>, French COVID study group<sup>†</sup>, COMET consortium<sup>†</sup>, Guy  
Gorochov<sup>69,70</sup>, Cédric Laouenan<sup>33,71,72</sup>, Carlos Rodríguez-Gallego<sup>73,74</sup>, Lisa F. P. Ng<sup>75</sup>, Laurent  
Renia<sup>75-77</sup>, Aurora Pujol<sup>78</sup>, Alexandre Belot<sup>56,79</sup>, François Raffi<sup>61</sup>, Luis M. Allende<sup>22</sup>, Javier

Martinez-Picado<sup>80-83</sup>, Tayfun Ozcelik<sup>84</sup>, Sevgi Keles<sup>51</sup>, Luisa Imberti<sup>25</sup>, Luigi D. Notarangelo<sup>14</sup>,  
Jesus Troya<sup>85</sup>, Xavier Solanich<sup>58</sup>, Shen-Ying Zhang<sup>1-3</sup>, Anne Puel<sup>1-3</sup>, Michael R Wilson<sup>11</sup>, Sophie  
Trouillet-Assant<sup>86</sup>, Laurent Abel<sup>1-3</sup>, Emmanuelle Jouanguy<sup>1-3</sup>, Chun Jimmie Ye<sup>10,87-90,§</sup>, Aurélie  
Cobat<sup>1-3,§</sup>, Leslie M. Thompson<sup>91,§</sup>, Evangelos Andreacos<sup>16,§</sup>, Qian Zhang<sup>1-3,§</sup>, Mark S.  
Anderson<sup>7,92,#,@</sup>, Jean-Laurent Casanova<sup>1-4,93,#,@</sup> and Joseph L. DeRisi<sup>8,10,#,@</sup>

\*These authors contributed equally to this work.

§These authors contributed equally to this work.

§These authors contributed equally to this work.

#These authors contributed equally to this work.

†All collaborators and their affiliations appear at the end of this paper.

@corresponding authors: [Mark.Anderson@ucsf.edu](mailto:Mark.Anderson@ucsf.edu); [jean-laurent.casanova@rockefeller.edu](mailto:jean-laurent.casanova@rockefeller.edu);  
[jderisi@gmail.com](mailto:jderisi@gmail.com)

**This PDF file includes:**

Supplementary table S1 and legends to supplementary table (S1)

Legends to supplementary figure S1

Supplementary figure S1

## Supplementary materials and methods

### Subjects and samples

We enrolled, from 6 countries, 48 patients with proven hypoxemic COVID-19 pneumonia, 12 unvaccinated controls, and 11 vaccinated controls in this study. We collected plasma or serum samples for all these individuals to test by immuno-assay for the presence of IgG Abs against SARS-CoV-2 and auto-Abs to type I IFNs. All individuals were recruited according to protocols approved by local Institutional Review Boards (IRBs). For patients were enrolled in the French COVID cohort (clinicaltrials.gov NCT04262921), ethics approval was obtained from the CPP IDF VI (ID RCB: 2020-A00256-33). For patients enrolled at UCSF, IRB number was: 20-30497. All protocols conformed to local ethics recommendations and informed consent was obtained when required.

**Table S1: Antibody response to the vaccine**

|                                         | <b>Spike p-val</b> | <b>RBD p-val</b> |
|-----------------------------------------|--------------------|------------------|
| NOVAX vs POSTVAX                        | 8,46E-18           | 8,98E-15         |
| NOVAX vs all breakthrough (n=40)        | 1,95E-06           | 0,000147706      |
| aab+ (n=10) vs aab- breakthrough (n=30) | 0,4320157          | 0,259816689      |

**Figure S1: No neutralizing auto-Abs against IFN- $\alpha$ 2 and IFN- $\omega$  in patients with hypoxemic breakthrough COVID-19 and an insufficient serological response or immunodeficiencies. Serological response in auto-Ab positive patients. (A)** Spike(S)-protein and receptor binding domain (RBD) serological titers, plotted against each other for breakthrough COVID-19 patients **(B)** Neutralization of 10 ng/mL IFN- $\alpha$ 2, IFN- $\omega$  or IFN- $\beta$  in the presence of plasma 1/10 from patients with hypoxemic breakthrough COVID-19 and previously known immunodeficiency (N=5) or with low Ab response to the virus (n=1). The patients with low Ab response to the virus is shown with an arrow. Relative luciferase activity is shown (ISRE dual luciferase activity, with normalization against *Renilla* luciferase activity) after stimulation with 10ng/mL IFN- $\alpha$ 2 or IFN- $\omega$  in the presence of plasma 1/10. RLA: relative luciferase activity. **(C)** Neutralization of 100 pg/mL IFN- $\alpha$ 2 or IFN- $\omega$  in the presence of plasma 1/10 from patients with hypoxemic breakthrough COVID-19 and previously known immunodeficiency (N=5) or with low Ab response to the virus (n=1). **(D)** Spike(S)-protein and receptor binding domain (RBD) serological titers of the 10 auto-Ab positive patients. **(E)** Spike(S)-protein and receptor binding domain (RBD) serological titers of the 10 auto-Ab positive patients, represented individually.
